# Supplementary material for: Influence of surface chemical properties on the toxicity of engineered zinc oxide nanoparticles to embryonic zebrafish
Source: Beilstein J Nanotechnol. 2015 Jul 20;6:1568–79. doi: 10.3762/bjnano.6.160 (PMC4578392; doi:10.3762/bjnano.6.160)
Supplement: File 1 — Zebrafish malformation and behavioral data. The 19 sub-lethal endpoints are developmental progression (DP), spontaneous movement (SP), notochord (N), yolk sac edema (Y), axis (A), eye (E), snout (Sn), jaw (J), otic (O), heart (H), brain (B), somite (So), pectoral fin (PF), caudal fin (CF), pigment (P), circulation (C), trunk (T), swim bladder (SB), and touch response (TR). [file Beilstein_J_Nanotechnol-06-1568-s001.xlsx]

## Sheet: S1-EPs data
comp.	Size	Conc.(ppm)	DP	SM	N	Y	A	E	Sn	J	O	H	B	So	PF	CF	P	C	T	SB	TR
nbi_085: Aldrich ZnO+Oleic Acid (TLAD25A)	62	0	0	0	0	0	0	0	0	0	0	0	0	0	0	0	0	0	0	0	0
		0.016	0	0	0	0	0	0	0	0	0	0	0	0	0	0	0	0	0	0	0
		0.08	0	0	0	0	0	0	0	0	0	0	0	0	0	0	0	0	0	0.0625	0
		0.4	0	0	0	0	0	0	0	0	0	0	0	0	0	0	0	0	0	0	0
		2	0	0	0	0	0	0	0	0	0	0	0	0	0	0	0	0	0	0	0
		10	0	0	0	0	0	0	0	0	0	0	0	0	0	0	0	0	0	0	0
		50	0	0	0	0	0	0	0	0	0	0	0	0	0	0	0	0	0	0	0
		250	0	0	0	0	0	0	0	0	0	0	0	0	0	0	0	0	0	0	0
nbi_086: Voxtel ZnO + Oleic Acid (TLAD25)	26	0	0	0	0	0	0	0	0	0	0	0	0	0	0	0	0	0	0	0	0
		0.016	0	0	0	0	0.0526316	0	0	0	0	0	0	0	0	0	0	0	0	0	0
		0.08	0	0	0	0	0	0	0	0	0	0	0	0	0	0	0	0	0	0	0
		0.4	0	0	0	0	0	0	0	0	0	0	0	0	0	0	0	0	0	0	0
		2	0	0	0	0	0	0	0	0	0	0	0	0	0	0	0	0	0	0	0
		10	0	0	0	0	0	0	0	0	0	0	0	0	0	0	0	0	0	0	0
		50	0	0	0	0	0	0	0	0	0	0	0	0	0	0	0	0	0	0	0
		250	0	0	0	0	0	0	0	0	0	0	0	0	0	0	0	0	0	0	0
nbi_087: Aldrich ZnO (TLAD24A)	62	0	0	0	0	0	0	0	0	0	0	0	0	0	0	0	0	0	0	0	0
		0.016	0	0	0	0	0	0	0	0	0	0	0	0	0	0	0	0	0	0	0
		0.08	0	0	0	0	0	0	0	0	0	0	0	0	0	0	0	0	0	0	0
		0.4	0	0	0	0	0	0	0	0	0	0	0	0	0	0	0	0	0	0	0
		2	0	0	0	0	0	0	0	0	0	0	0	0	0	0	0	0	0	0	0
		10	0	0	0	0	0	0	0	0	0	0	0	0	0	0	0	0	0	0	0
		50	0	0	0	0	0.0555556	0	0	0	0	0	0	0	0	0	0	0	0	0	0
		250	0	0	0	0	0	0	0	0	0	0	0	0	0	0	0	0	0	0	0
nbi_088: Voxtel ZnO (TLAD24)	26	0	0	0	0	0	0	0	0	0	0	0	0	0	0	0	0	0	0	0	0
		0.016	0	0	0	0	0	0	0	0	0	0	0	0	0	0	0	0	0	0	0
		0.08	0	0	0	0	0	0	0	0	0	0	0	0	0	0	0	0	0	0	0
		0.4	0.047619	0	0	0	0	0	0	0	0	0	0	0	0	0	0	0	0	0	0
		2	0.05	0	0	0.05	0.1	0.05	0.05	0.05	0.05	0.05	0.05	0.05	0.05	0.05	0	0.05	0.05	0.05	0.05
		10	0.0454545	0	0	0	0	0	0	0	0	0	0	0	0	0	0	0	0	0	0
		50	0	0	0	0	0	0	0	0	0	0	0	0	0	0	0	0	0	0	0
		250	0	0	0	0	0	0	0	0	0	0	0	0	0	0	0	0	0	0	0
nbi_089: Aldrich ZnO + Octanoic Acid (TLAD27A)	62	0	0	0	0	0	0	0	0	0	0	0	0	0	0	0	0	0	0	0	0
		0.016	0	0	0	0	0	0	0	0	0	0	0	0	0	0	0	0	0	0	0
		0.08	0	0	0	0	0.1	0	0	0	0	0	0	0	0	0	0	0	0	0	0
		0.4	0	0	0	0	0	0	0	0	0	0	0	0	0	0	0	0	0	0	0
		2	0	0	0	0	0	0	0	0	0	0	0	0	0	0	0	0	0	0	0
		10	0	0	0	0.0666667	0.0666667	0.0666667	0.0666667	0.0666667	0	0.0666667	0.0666667	0	0	0.0666667	0	0	0	0	0
		50	0	0	0	0	0	0	0	0	0	0	0	0	0	0	0	0	0	0	0
		250	0	0	0	0	0	0	0	0	0	0	0	0	0	0	0	0	0	0	0
nbi_090: Voxtel ZnO + Octanoic Acid (TLAD27)	26	0	0	0	0	0	0	0	0	0	0	0	0	0	0	0	0	0	0	0	0
		0.016	0	0	0	0	0	0	0	0	0	0	0	0	0	0	0	0	0	0	0
		0.08	0	0	0	0	0	0	0	0	0	0.0526316	0	0	0	0	0	0	0	0	0.0526316
		0.4	0	0	0	0	0	0	0	0	0	0	0	0	0	0	0	0	0	0	0
		2	0	0	0	0.0555556	0	0	0	0	0	0	0	0	0	0	0	0	0	0.0555556	0
		10	0	0	0	0	0	0	0	0	0	0	0	0	0	0	0	0	0	0	0
		50	0	0	0	0	0	0	0	0	0	0	0	0	0	0	0	0	0	0	0
		250	0	0	0	0	0	0	0	0	0	0	0	0	0	0	0	0	0	0	0
nbi_091: Aldrich ZnO + para-Nitrobenzoic Acid (TLAD35A)	62	0	0	0	0	0	0	0	0	0	0	0	0	0	0	0	0	0	0	0	0
		0.016	0	0	0	0	0	0	0	0	0	0	0	0	0	0	0	0	0	0	0
		0.08	0	0	0	0	0	0	0	0	0	0	0	0	0	0	0	0	0	0	0
		0.4	0	0	0	0	0	0	0	0	0	0	0	0	0	0	0	0	0	0	0
		2	0	0	0	0	0	0	0	0	0	0	0	0	0	0	0	0	0	0	0
		10	0	0	0	0	0	0	0	0	0	0	0	0	0	0	0	0	0	0	0
		50	0	0	0	0	0	0	0	0	0	0	0	0	0	0	0	0	0	0	0
		250	0.0434783	0	0	0	0	0	0	0	0	0	0	0	0.047619	0	0	0	0	0.047619	0
nbi_092: Voxtel ZnO + para-Nitrobenzoic Acid (TLAD35)	26	0	0	0	0	0	0	0	0	0	0	0	0	0	0	0	0	0	0	0	0
		0.016	0	0	0	0	0	0	0	0	0	0	0	0	0	0	0	0	0	0	0
		0.08	0	0	0	0	0	0	0	0	0	0	0	0	0	0	0	0	0	0	0
		0.4	0	0	0	0	0	0	0	0	0	0	0	0	0	0	0	0	0	0	0
		2	0	0	0	0	0	0	0	0	0	0	0	0	0	0	0	0	0	0	0
		10	0.0434783	0	0	0.0434783	0.0434783	0.0434783	0	0.0434783	0	0.0434783	0.0434783	0	0.0434783	0.0434783	0	0.0434783	0.0434783	0.0434783	0.0434783
		50	0.0416667	0	0	0	0	0	0	0	0	0	0	0	0	0	0	0	0	0	0
		250	0	0	0	0.0434783	0	0	0.0434783	0	0	0.0434783	0	0	0	0	0	0	0	0	0
nbi_093: Aldrich ZnO + Cyclohexane Carboxilic Acid (TLAD31A)	62	0	0	0	0	0	0	0	0	0	0	0	0	0	0	0	0	0	0	0	0
		0.016	0	0	0	0.0454545	0.0454545	0.0454545	0.0454545	0.0454545	0	0.0454545	0.0454545	0	0.0454545	0.0454545	0	0	0.0454545	0.0454545	0
		0.08	0	0	0	0	0	0	0	0	0	0	0	0	0	0	0	0	0	0	0
		0.4	0	0	0	0	0	0	0	0	0	0	0	0	0	0	0	0	0	0	0
		2	0	0	0	0	0	0	0	0	0	0	0	0	0	0	0	0	0	0	0
		10	0	0	0	0	0	0	0	0	0	0	0	0	0	0	0	0	0	0	0
		50	0	0	0	0	0	0	0	0	0	0	0	0	0	0	0	0	0	0	0
		250	0	0	0	0	0	0	0	0	0	0	0	0	0	0	0	0	0	0	0
nbi_094: Voxtel ZnO + Cyclohexane Carboxilic Acid (TLAD31)	26	0	0	0	0	0	0	0	0	0	0	0	0	0	0	0	0	0	0	0	0
		0.016	0	0	0	0.0416667	0.0416667	0.0416667	0.0416667	0.0416667	0	0.0416667	0.0416667	0.0416667	0.0416667	0.0416667	0	0.0416667	0.0416667	0	0
		0.08	0	0	0	0	0	0	0	0	0	0	0	0	0	0	0	0	0	0	0
		0.4	0	0	0	0	0	0	0	0	0	0	0	0	0	0	0	0	0	0	0
		2	0	0	0	0	0	0	0	0	0	0	0	0	0	0	0	0	0	0	0
		10	0	0	0	0	0	0	0	0	0	0	0	0	0	0	0	0	0	0	0
		50	0.0416667	0	0	0	0	0	0	0	0	0	0	0	0	0	0	0	0	0	0
		250	0.047619	0	0	0	0	0	0	0	0	0	0	0	0	0	0	0	0	0	0
nbi_095: Aldrich ZnO + Benzoic Acid (TLAD33A)	62	0	0	0	0	0	0	0	0	0	0	0	0	0	0	0	0	0	0	0	0
		0.016	0	0	0	0	0	0	0	0	0	0	0	0	0	0	0	0	0	0	0
		0.08	0	0	0	0	0	0	0	0	0	0	0	0	0	0	0	0	0	0	0
		0.4	0.0526316	0	0	0	0.0526316	0	0	0	0	0	0	0	0.0526316	0	0	0	0	0.0526316	0
		2	0	0	0	0	0	0	0	0	0	0	0	0	0	0	0	0	0	0	0
		10	0.0526316	0	0	0	0.0555556	0	0	0	0	0	0	0	0.0555556	0	0	0	0	0.0555556	0
		50	0	0	0	0	0	0	0	0	0	0	0	0	0	0	0	0	0	0	0
		250	0.047619	0	0	0	0.05	0	0	0	0	0	0	0	0.05	0	0	0	0	0.05	0
nbi_096: Voxtel ZnO + Benzoic Acid (TLAD33)	26	0	0	0	0	0	0	0	0	0	0	0	0	0	0	0	0	0	0	0	0
		0.016	0	0	0	0	0	0	0	0	0	0	0	0	0	0	0	0	0	0	0
		0.08	0	0	0	0	0	0	0	0	0	0	0	0	0	0	0	0	0	0	0
		0.4	0	0	0	0	0	0	0	0	0	0	0	0	0	0	0	0	0	0	0
		2	0	0	0	0	0	0	0	0	0	0	0	0	0	0	0	0	0	0	0
		10	0	0	0	0	0	0	0	0	0	0	0	0	0	0	0	0	0	0	0
		50	0	0	0	0	0	0	0	0	0	0	0	0	0	0	0	0	0	0	0
		250	0	0	0	0	0	0	0	0	0	0	0	0	0	0	0	0	0	0	0
nbi_136: ZnO I (NI001)	12.6-16.6	0	0	0	0	0	0.0416667	0	0	0	0	0	0	0	0	0	0	0	0	0	0
		0.016	0.0416667	0	0	0	0.0434783	0	0	0	0	0	0	0	0	0.0434783	0	0	0	0	0
		0.08	0.047619	0.047619	0	0	0	0	0	0	0	0	0	0	0	0	0	0	0	0	0
		0.4	0	0	0	0	0	0	0	0	0	0	0	0	0	0	0	0	0	0	0
		2	0.0416667	0.0416667	0	0	0	0	0	0	0	0	0	0	0	0	0	0	0	0	0
		10	0	0	0	0	0	0	0	0	0	0	0	0	0	0	0	0	0	0	0
		50	0	0	0	0	0.0434783	0	0	0	0	0	0	0	0	0	0	0	0	0	0
		250	0	0	0	0	0	0	0	0	0	0	0	0	0	0	0	0	0	0	0
nbi_137: ZnO I (NI002)	18.3-48.9	0	0	0	0	0	0	0	0	0	0	0	0	0	0	0	0	0	0	0	0
		0.016	0	0	0	0	0	0	0	0	0	0	0	0	0	0	0	0	0	0	0
		0.08	0	0	0	0	0.0416667	0	0.0416667	0	0	0	0	0	0	0	0	0	0	0.0416667	0
		0.4	0	0	0	0.0454545	0.0454545	0.0454545	0.0454545	0.0454545	0.0454545	0.0454545	0.0454545	0.0454545	0.0454545	0.0454545	0.0454545	0.0454545	0.0454545	0.0454545	0.0454545
		2	0	0	0	0	0	0	0	0	0	0	0	0	0	0	0	0	0	0	0
		10	0	0	0	0	0	0	0	0	0	0	0	0	0	0	0	0	0	0	0
		50	0	0	0	0.0434783	0.0434783	0.0434783	0.0434783	0.0434783	0.0434783	0.0434783	0.0434783	0.0434783	0.0434783	0.0434783	0.0434783	0.0434783	0.0434783	0.0434783	0.0434783
		250	0.0454545	0	0	0.047619	0	0	0.047619	0.047619	0	0.047619	0.047619	0	0	0	0	0	0	0	0
nbi_138: ZnO I (NI003)	4.0-5.0	0	0	0	0	0	0	0	0	0	0	0	0	0	0	0	0	0	0	0	0
		0.016	0	0	0	0	0	0	0	0	0	0	0	0	0	0	0	0	0	0	0
		0.08	0	0	0	0.05	0	0.05	0.05	0.05	0	0.05	0	0	0	0	0	0	0	0	0
		0.4	0	0	0	0	0	0	0	0	0	0	0	0	0	0	0	0	0	0	0
		2	0	0	0	0.047619	0.047619	0.047619	0.047619	0	0	0	0.047619	0	0	0	0	0	0	0	0
		10	0	0	0	0.0909091	0.0909091	0.0909091	0.0909091	0.0909091	0	0.0909091	0.0909091	0	0.0454545	0.0454545	0	0	0	0	0
		50	0.0454545	0	0	0.0909091	0.0909091	0.0909091	0.0909091	0.0909091	0	0.0909091	0.0909091	0	0.0454545	0.0909091	0	0	0.0454545	0	0
		250	0	0	0	0	0	0	0	0	0	0	0	0	0	0	0	0	0	0	0
nbi_139: ZnO I (NI005)	8.7-11.7	0	0	0	0	0	0	0	0	0	0	0	0	0	0	0	0	0	0	0	0
		0.016	0	0	0	0.05	0.05	0.05	0.05	0.05	0	0.05	0	0	0	0	0	0	0	0	0
		0.08	0	0	0	0.0909091	0.0909091	0.0909091	0.0454545	0.0454545	0	0	0.0454545	0.0454545	0	0	0	0	0	0	0
		0.4	0	0	0	0	0	0	0	0	0	0	0	0	0	0	0	0	0	0	0
		2	0	0	0	0.0416667	0.0416667	0.0416667	0.0416667	0.0416667	0	0.0416667	0.0416667	0	0	0	0	0	0	0.0416667	0
		10	0	0	0	0.0952381	0.0952381	0.0952381	0.0952381	0.0952381	0.0952381	0.0952381	0.0952381	0	0	0	0	0	0	0.0952381	0.047619
		50	0	0	0	0	0	0	0	0	0	0	0	0	0	0	0	0	0	0	0
		250	0	0	0	0	0	0	0	0	0	0	0	0	0	0	0	0	0	0	0
nbi_187: NanoGard ZnO	40-100	0	0	0	0	0	0	0	0	0	0	0	0	0	0	0	0	0	0	0	0
		0.016	0	0	0	0	0	0	0	0	0	0	0	0	0	0	0	0	0	0.0833333	0
		0.08	0	0	0	0	0	0	0	0	0	0	0	0	0	0	0	0	0	0.0416667	0
		0.4	0	0	0	0	0	0	0	0	0	0.0416667	0	0	0	0	0.0416667	0	0	0.0416667	0
		2	0	0	0	0.166667	0.0416667	0	0	0	0	0.125	0	0	0.0833333	0	0.0416667	0	0	0.166667	0
		10	0	0	0	0.133333	0.0666667	0	0	0	0	0.2	0	0	0.0666667	0	0	0	0	0.266667	0
		50	0	0	0	all dead — no data availiable
		250	0	0	0.181818
