# Supplementary material for: Influence of surface chemical properties on the toxicity of engineered zinc oxide nanoparticles to embryonic zebrafish
Source: Beilstein J Nanotechnol. 2015 Jul 20;6:1568–79. doi: 10.3762/bjnano.6.160 (PMC4578392; doi:10.3762/bjnano.6.160)
Supplement: File 2 — Fisher’s exact test p-value. The 19 sub-lethal endpoints are developmental progression (DP), spontaneous movement (SP), notochord (N), yolk sac edema (Y), axis (A), eye (E), snout (Sn), jaw (J), otic (O), heart (H), brain (B), somite (So), pectoral fin (PF), caudal fin (CF), pigment (P), circulation (C), trunk (T), swim bladder (SB), and touch response (TR). Included are three mortality (M) endpoints at 24 and 120 hours post fertilization after the exposure to ZnO NP and the sum of two M. [file Beilstein_J_Nanotechnol-06-1568-s002.xlsx]

## Sheet: ZnO with capping agents
(a) ZnO with capping agents' P-value data
composition	Size	dose(ppm)	M(24hpf)	DP	SM	N	M(120hpf)	Y	A	E	Sn	J	O	H	B	So	PF	CF	P	C	T	SB	TR	M(total)
nbi_085: Aldrich ZnO+Oleic Acid (TLAD25A)	62	0	1	1	1	1	1	1	1	1	1	1	1	1	1	1	1	1	1	1	1	1	1	1
		0.016	0.348	1	1	1	0.465	1	1	1	1	1	1	1	1	1	1	1	1	1	1	1	1	0.188
		0.08	0.023	1	1	1	1	1	1	1	1	1	1	1	1	1	1	1	1	1	1	0.41	1	0.023
		0.4	1	1	1	1	1	1	1	1	1	1	1	1	1	1	1	1	1	1	1	1	1	1
		2	0.348	1	1	1	1	1	1	1	1	1	1	1	1	1	1	1	1	1	1	1	1	0.348
		10	1	1	1	1	1	1	1	1	1	1	1	1	1	1	1	1	1	1	1	1	1	1
		50	0.188	1	1	1	1	1	1	1	1	1	1	1	1	1	1	1	1	1	1	1	1	0.188
		250	1	1	1	1	1	1	1	1	1	1	1	1	1	1	1	1	1	1	1	1	1	1
nbi_086: Voxtel ZnO + Oleic Acid (TLAD25)	26	0	1	1	1	1	1	1	1	1	1	1	1	1	1	1	1	1	1	1	1	1	1	1
		0.016	0.348	1	1	1	0.465	1	0.452	1	1	1	1	1	1	1	1	1	1	1	1	1	1	0.188
		0.08	0.048	1	1	1	1	1	1	1	1	1	1	1	1	1	1	1	1	1	1	1	1	0.048
		0.4	1	1	1	1	1	1	1	1	1	1	1	1	1	1	1	1	1	1	1	1	1	1
		2	0.097	1	1	1	1	1	1	1	1	1	1	1	1	1	1	1	1	1	1	1	1	0.097
		10	0.023	1	1	1	1	1	1	1	1	1	1	1	1	1	1	1	1	1	1	1	1	0.023
		50	0.001	1	1	1	1	1	1	1	1	1	1	1	1	1	1	1	1	1	1	1	1	0.004
		250	0.001	1	1	1	0.395	1	1	1	1	1	1	1	1	1	1	1	1	1	1	1	1	0.002
nbi_089: Aldrich ZnO + Octanoic Acid (TLAD27A)	62	0	1	1	1	1	1	1	1	1	1	1	1	1	1	1	1	1	1	1	1	1	1	1
		0.016	1	1	1	1	0.233	1	1	1	1	1	1	1	1	1	1	1	1	1	1	1	1	0.348
		0.08	0.609	1	1	1	1	1	0.21	1	1	1	1	1	1	1	1	1	1	1	1	1	1	0.348
		0.4	0.048	1	1	1	1	1	1	1	1	1	1	1	1	1	1	1	1	1	1	1	1	0.048
		2	0.348	1	1	1	1	1	1	1	1	1	1	1	1	1	1	1	1	1	1	1	1	0.348
		10	0.097	1	1	1	0.077	0.395	0.395	0.395	0.395	0.395	1	0.395	0.395	1	1	0.395	1	1	1	1	1	0.01
		50	0.048	1	1	1	1	1	1	1	1	1	1	1	1	1	1	1	1	1	1	1	1	0.048
		250	0.023	1	1	1	1	1	1	1	1	1	1	1	1	1	1	1	1	1	1	1	1	0.023
nbi_090: Voxtel ZnO + Octanoic Acid (TLAD27)	26	0	1	1	1	1	1	1	1	1	1	1	1	1	1	1	1	1	1	1	1	1	1	1
		0.016	0.348	1	1	1	1	1	1	1	1	1	1	1	1	1	1	1	1	1	1	1	1	0.348
		0.08	0.348	1	1	1	0.465	1	1	1	1	1	1	0.452	1	1	1	1	1	1	1	1	0.452	0.188
		0.4	0.609	1	1	1	1	1	1	1	1	1	1	1	1	1	1	1	1	1	1	1	1	0.609
		2	0.097	1	1	1	1	0.439	1	1	1	1	1	1	1	1	1	1	1	1	1	0.439	1	0.097
		10	0.609	1	1	1	1	1	1	1	1	1	1	1	1	1	1	1	1	1	1	1	1	0.609
		50	0.01	1	1	1	1	1	1	1	1	1	1	1	1	1	1	1	1	1	1	1	1	0.01
		250	0.048	1	1	1	1	1	1	1	1	1	1	1	1	1	1	1	1	1	1	1	1	0.048
nbi_091: Aldrich ZnO + para-Nitrobenzoic Acid (TLAD35A)	62	0	1	1	1	1	1	1	1	1	1	1	1	1	1	1	1	1	1	1	1	1	1	1
		0.016	1	1	1	1	1	1	1	1	1	1	1	1	1	1	1	1	1	1	1	1	1	1
		0.08	1	1	1	1	1	1	1	1	1	1	1	1	1	1	1	1	1	1	1	1	1	1
		0.4	1	1	1	1	1	1	1	1	1	1	1	1	1	1	1	1	1	1	1	1	1	1
		2	0.348	1	1	1	1	1	1	1	1	1	1	1	1	1	1	1	1	1	1	1	1	0.348
		10	1	1	1	1	1	1	1	1	1	1	1	1	1	1	1	1	1	1	1	1	1	1
		50	1	1	1	1	1	1	1	1	1	1	1	1	1	1	1	1	1	1	1	1	1	1
		250	1	1	1	1	0.489	1	1	1	1	1	1	1	1	1	1	1	1	1	1	1	1	0.609
nbi_092: Voxtel ZnO + para-Nitrobenzoic Acid (TLAD35)	26	0	1	1	1	1	1	1	1	1	1	1	1	1	1	1	1	1	1	1	1	1	1	1
		0.016	1	1	1	1	1	1	1	1	1	1	1	1	1	1	1	1	1	1	1	1	1	1
		0.08	1	1	1	1	1	1	1	1	1	1	1	1	1	1	1	1	1	1	1	1	1	1
		0.4	1	1	1	1	1	1	1	1	1	1	1	1	1	1	1	1	1	1	1	1	1	1
		2	1	1	1	1	1	1	1	1	1	1	1	1	1	1	1	1	1	1	1	1	1	1
		10	1	0.489	1	1	1	1	0.489	0.489	1	0.489	1	0.489	0.489	1	0.489	0.489	1	0.489	0.489	0.489	0.489	1
		50	1	1	1	1	1	1	1	1	1	1	1	1	1	1	1	1	1	1	1	1	1	1
		250	1	1	1	1	1	1	1	1	0.489	1	1	0.489	1	1	1	1	1	1	1	1	1	1
nbi_093: Aldrich ZnO + Cyclohexane Carboxilic Acid (TLAD31A)	62	0	1	1	1	1	1	1	1	1	1	1	1	1	1	1	1	1	1	1	1	1	1	1
		0.016	0.489	1	1	1	1	0.489	0.478	0.478	0.478	0.478	1	0.478	0.478	1	0.478	0.478	1	1	0.478	0.478	1	0.489
		0.08	1	1	1	1	1	1	1	1	1	1	1	1	1	1	1	1	1	1	1	1	1	1
		0.4	0.234	1	1	1	1	1	1	1	1	1	1	1	1	1	1	1	1	1	1	1	1	0.234
		2	0.009	1	1	1	1	1	1	1	1	1	1	1	1	1	1	1	1	1	1	1	1	0.009
		10	0.022	1	1	1	0.439	1	1	1	1	1	1	1	1	1	1	1	1	1	1	1	1	0.009
		50	0.022	1	1	1	1	1	1	1	1	1	1	1	1	1	1	1	1	1	1	1	1	0.022
		250	0.009	1	1	1	1	1	1	1	1	1	1	1	1	1	1	1	1	1	1	1	1	0.009
nbi_094: Voxtel ZnO + Cyclohexane Carboxilic Acid (TLAD31)	26	0	1	1	1	1	1	1	1	1	1	1	1	1	1	1	1	1	1	1	1	1	1	1
		0.016	1	1	1	1	1	1	1	1	1	1	1	1	1	1	1	1	1	1	1	1	1	1
		0.08	1	1	1	1	1	1	1	1	1	1	1	1	1	1	1	1	1	1	1	1	1	1
		0.4	0.489	1	1	1	1	1	1	1	1	1	1	1	1	1	1	1	1	1	1	1	1	0.489
		2	1	1	1	1	1	1	1	1	1	1	1	1	1	1	1	1	1	1	1	1	1	1
		10	1	1	1	1	1	1	1	1	1	1	1	1	1	1	1	1	1	1	1	1	1	1
		50	1	1	1	1	1	1	1	1	1	1	1	1	1	1	1	1	1	1	1	1	1	1
		250	0.234	0.477	1	1	1	1	1	1	1	1	1	1	1	1	1	1	1	1	1	1	1	0.234
nbi_095: Aldrich ZnO + Benzoic Acid (TLAD33A)	62	0	1	1	1	1	1	1	1	1	1	1	1	1	1	1	1	1	1	1	1	1	1	1
		0.016	0.416	1	1	1	0.209	1	1	1	1	1	1	1	1	1	1	1	1	1	1	1	1	0.137
		0.08	1	1	1	1	0.45	1	1	1	1	1	1	1	1	1	1	1	1	1	1	1	1	0.666
		0.4	0.416	0.463	1	1	1	1	0.463	1	1	1	1	1	1	1	0.463	1	1	1	1	0.463	1	0.416
		2	1	1	1	1	1	1	1	1	1	1	1	1	1	1	1	1	1	1	1	1	1	1
		10	0.416	0.463	1	1	1	1	0.45	1	1	1	1	1	1	1	0.45	1	1	1	1	0.45	1	0.245
		50	0.666	1	1	1	1	1	1	1	1	1	1	1	1	1	1	1	1	1	1	1	1	0.666
		250	1	0.488	1	1	0.45	1	0.476	1	1	1	1	1	1	1	0.476	1	1	1	1	0.476	1	0.666
nbi_096: Voxtel ZnO + Benzoic Acid (TLAD33)	26	0	1	1	1	1	1	1	1	1	1	1	1	1	1	1	1	1	1	1	1	1	1	1
		0.016	1	1	1	1	0.45	1	1	1	1	1	1	1	1	1	1	1	1	1	1	1	1	0.666
		0.08	0.245	1	1	1	0.209	1	1	1	1	1	1	1	1	1	1	1	1	1	1	1	1	0.137
		0.4	1	1	1	1	1	1	1	1	1	1	1	1	1	1	1	1	1	1	1	1	1	1
		2	0.072	1	1	1	1	1	1	1	1	1	1	1	1	1	1	1	1	1	1	1	1	0.072
		10	1	1	1	1	1	1	1	1	1	1	1	1	1	1	1	1	1	1	1	1	1	1
		50	0.416	1	1	1	1	1	1	1	1	1	1	1	1	1	1	1	1	1	1	1	1	0.416
		250	1	1	1	1	0.233	1	1	1	1	1	1	1	1	1	1	1	1	1	1	1	1	0.416
significant in fisher's exact test
blank control data

## Sheet: ZnO without capping agent
(b) ZnO without capping agent P-value data
composition	Size	dose(ppm)	M(24hpf)	DP	SM	N	M(120hpf)	Y	A	E	Sn	J	O	H	B	So	PF	CF	P	C	T	SB	TR	M(total)
nbi_087: Aldrich ZnO (TLAD24A)	62	0	1	1	1	1	1	1	1	1	1	1	1	1	1	1	1	1	1	1	1	1	1	1
		0.016	0.348	1	1	1	1	1	1	1	1	1	1	1	1	1	1	1	1	1	1	1	1	0.348
		0.08	0.048	1	1	1	0.425	1	1	1	1	1	1	1	1	1	1	1	1	1	1	1	1	0.023
		0.4	0.188	1	1	1	1	1	1	1	1	1	1	1	1	1	1	1	1	1	1	1	1	0.188
		2	0.348	1	1	1	1	1	1	1	1	1	1	1	1	1	1	1	1	1	1	1	1	0.348
		10	0.609	1	1	1	1	1	1	1	1	1	1	1	1	1	1	1	1	1	1	1	1	0.609
		50	0.097	1	1	1	1	1	0.439	1	1	1	1	1	1	1	1	1	1	1	1	1	1	0.097
		250	0.097	1	1	1	0.439	1	1	1	1	1	1	1	1	1	1	1	1	1	1	1	1	0.048
nbi_088: Voxtel ZnO (TLAD24)	26	0	1	1	1	1	1	1	1	1	1	1	1	1	1	1	1	1	1	1	1	1	1	1
		0.016	0.348	1	1	1	1	1	1	1	1	1	1	1	1	1	1	1	1	1	1	1	1	0.348
		0.08	1	1	1	1	1	1	1	1	1	1	1	1	1	1	1	1	1	1	1	1	1	1
		0.4	0.609	0.477	1	1	0.222	1	1	1	1	1	1	1	1	1	1	1	1	1	1	1	1	0.188
		2	0.348	0.465	1	1	1	0.465	0.21	0.465	0.465	0.465	0.465	0.465	0.465	0.465	0.465	0.465	1	0.465	0.465	0.465	0.465	0.348
		10	1	0.489	1	1	0.489	1	1	1	1	1	1	1	1	1	1	1	1	1	1	1	1	0.609
		50	0.609	1	1	1	1	1	1	1	1	1	1	1	1	1	1	1	1	1	1	1	1	0.609
		250	0.048	1	1	1	1	1	1	1	1	1	1	1	1	1	1	1	1	1	1	1	1	0.048
nbi_136: ZnO I (NI001)	12.6-16.6	0	1	1	1	1	1	1	1	1	1	1	1	1	1	1	1	1	1	1	1	1	1	1
		0.016	1	1	1	1	1	1	1	1	1	1	1	1	1	1	1	0.489	1	1	1	1	1	1
		0.08	0.234	0.477	0.477	1	0.04	1	1	1	1	1	1	1	1	1	1	1	1	1	1	1	1	0.009
		0.4	0.234	1	1	1	1	1	1	1	1	1	1	1	1	1	1	1	1	1	1	1	1	0.234
		2	1	1	1	1	0.234	1	1	1	1	1	1	1	1	1	1	1	1	1	1	1	1	0.234
		10	1	1	1	1	1	1	1	1	1	1	1	1	1	1	1	1	1	1	1	1	1	1
		50	1	1	1	1	1	1	1	1	1	1	1	1	1	1	1	1	1	1	1	1	1	1
		250	0.05	1	1	1	0.442	1	1	1	1	1	1	1	1	1	1	1	1	1	1	1	1	0.022
nbi_137: ZnO I (NI002)	18.3-48.9	0	1	1	1	1	1	1	1	1	1	1	1	1	1	1	1	1	1	1	1	1	1	1
		0.016	1	1	1	1	0.223	1	1	1	1	1	1	1	1	1	1	1	1	1	1	1	1	0.666
		0.08	0.489	1	1	1	1	1	1	1	1	1	1	1	1	1	1	1	1	1	1	1	1	0.489
		0.4	1	1	1	1	1	1	1	1	1	1	1	1	1	1	1	1	1	1	1	1	1	1
		2	1	1	1	1	1	1	1	1	1	1	1	1	1	1	1	1	1	1	1	1	1	1
		10	1	1	1	1	1	1	1	1	1	1	1	1	1	1	1	1	1	1	1	1	1	1
		50	1	1	1	1	1	1	1	1	1	1	1	1	1	1	1	1	1	1	1	1	1	1
		250	1	1	1	1	1	0.488	1	1	0.488	0.488	1	0.488	0.488	1	1	1	1	1	1	1	1	1
nbi_138: ZnO I (NI003)	4.0-5.0	0	1	1	1	1	1	1	1	1	1	1	1	1	1	1	1	1	1	1	1	1	1	1
		0.016	1	1	1	1	1	1	1	1	1	1	1	1	1	1	1	1	1	1	1	1	1	0.234
		0.08	1	1	1	1	0.467	0.465	1	0.465	0.465	0.465	1	0.465	1	1	1	1	1	1	1	1	1	0.109
		0.4	1	1	1	1	0.234	1	1	1	1	1	1	1	1	1	1	1	1	1	1	1	1	0.022
		2	1	1	1	1	1	0.477	0.467	0.477	0.477	1	1	1	0.477	1	1	1	1	1	1	1	1	0.234
		10	1	1	1	1	0.489	0.223	0.223	0.223	0.223	0.223	1	0.223	0.223	1	0.478	0.478	1	1	1	1	1	0.489
		50	1	0.478	1	1	1	0.223	0.223	0.223	0.223	0.223	1	0.223	0.223	1	0.478	0.223	1	1	0.478	1	1	0.489
		250	1	1	1	1	0.0032	1	1	1	1	1	1	1	1	1	1	1	1	1	1	1	1	0.002
nbi_139: ZnO I (NI005)	8.7-11.7	0	1	1	1	1	1	1	1	1	1	1	1	1	1	1	1	1	1	1	1	1	1	1
		0.016	1	1	1	1	0.488	0.476	0.476	0.476	0.476	0.476	1	0.476	1	1	1	1	1	1	1	1	1	0.666
		0.08	1	1	1	1	1	0.223	0.223	0.488	1	1	1	1	1	1	1	1	1	1	1	1	1	1
		0.4	1	1	1	1	1	1	1	1	1	1	1	1	1	1	1	1	1	1	1	1	1	1
		2	1	1	1	1	1	1	1	1	1	1	1	1	1	1	1	1	1	1	1	1	1	0.489
		10	1	1	1	1	1	0.233	0.233	0.233	0.233	0.233	0.233	0.233	0.233	1	1	1	1	1	1	0.233	0.488	1
		50	0.666	1	1	1	1	1	1	1	1	1	1	1	1	1	1	1	1	1	1	1	1	0.666
		250	0.245	1	1	1	1	1	1	1	1	1	1	1	1	1	1	1	1	1	1	1	1	0.245
nbi_187: NanoGard ZnO (NGZ)	40-100	0	1	1	1	1	1	1	1	1	1	1	1	1	1	1	1	1	1	1	1	1	1	1
		0.016	1	1	1	1	1	1	1	1	1	1	1	1	1	1	1	1	1	1	1	0.489	1	1
		0.08	1	1	1	1	1	1	1	1	1	1	1	1	1	1	1	1	1	1	1	1	1	1
		0.4	1	1	1	1	1	1	1	1	1	1	1	1	1	1	1	1	1	1	1	1	1	1
		2	1	1	1	1	1	0.109	1	1	1	1	1	0.234	1	1	0.489	1	1	1	1	0.109	1	1
		10	1	1	1	1	0.0016	0.489	0.395	1	1	1	1	0.054	1	1	0.395	1	1	1	1	0.018	1	0.01
		50	1	1	1	1	0.001	NA	NA	NA	NA	NA	NA	NA	NA	NA	NA	NA	NA	NA	NA	NA	NA	0.001
		250	1	1	1	0.049	0.001	NA	NA	NA	NA	NA	NA	NA	NA	NA	NA	NA	NA	NA	NA	NA	NA	0.001
significant in fisher's exact test
blank control data
