# Supplementary material for: Influence of surface chemical properties on the toxicity of engineered zinc oxide nanoparticles to embryonic zebrafish
Source: Beilstein J Nanotechnol. 2015 Jul 20;6:1568–79. doi: 10.3762/bjnano.6.160 (PMC4578392; doi:10.3762/bjnano.6.160)
Supplement: File 5 — Embryonic zebrafish mortality at 24 and 120 hours post fertilization after ZnO NP exposure. [file Beilstein_J_Nanotechnol-06-1568-s005.xlsx]

## Sheet: Mortality data
(a) ZnO with capping agents' Mortality data						(b) ZnO without capping agent Mortality data
composition	Size	dosage	24M	120M	Total M	composition	Size	dosage	24M	120M	Total M
		ppm	%	%	%			ppm	%	%	%
nbi_085: Aldrich ZnO+Oleic Acid (TLAD25A)	62	0	0.0416667	0	0.0416667	nbi_087: Aldrich ZnO (TLAD24A)	62	0	0.0416667	0	0.0416667
		0.016	0.166667	0.05	0.208333			0.016	0.166667	0	0.166667
		0.08	0.333333	0	0.333333			0.08	0.291667	0.0588235	0.333333
		0.4	0.0833333	0	0.0833333			0.4	0.208333	0	0.208333
		2	0.166667	0	0.166667			2	0.166667	0	0.166667
		10	0.0833333	0	0.0833333			10	0.125	0	0.125
		50	0.208333	0	0.208333			50	0.25	0	0.25
		250	0.0833333	0	0.0833333			250	0.25	0.0555556	0.291667
nbi_086: Voxtel ZnO + Oleic Acid (TLAD25)	26	0	0.0416667	0	0.0416667	nbi_088: Voxtel ZnO (TLAD24)	26	0	0.0416667	0	0.0416667
		0.016	0.166667	0.05	0.208333			0.016	0.166667	0	0.166667
		0.08	0.291667	0	0.291667			0.08	0.0833333	0	0.0833333
		0.4	0.0416667	0.0434783	0.0833333			0.4	0.125	0.0952381	0.208333
		2	0.25	0	0.25			2	0.166667	0	0.166667
		10	0.333333	0	0.333333			10	0.0833333	0.0454545	0.125
		50	0.416667	0	0.416667			50	0.125	0	0.125
		250	0.416667	0.0714286	0.458333			250	0.291667	0	0.291667
nbi_089: Aldrich ZnO + Octanoic Acid (TLAD27A)	62	0	0.0416667	0	0.0416667	nbi_136: ZnO I (NI001)	12.6-16.6	0	0	0	0
		0.016	0.0833333	0.0909091	0.166667			0.016	0	0.0416667	0.0416667
		0.08	0.125	0.047619	0.166667			0.08	0.125	0.190476	0.291667
		0.4	0.291667	0	0.291667			0.4	0.125	0	0.125
		2	0.166667	0	0.166667			2	0	0.125	0.125
		10	0.25	0.166667	0.375			10	0	0.0416667	0.0416667
		50	0.291667	0	0.291667			50	0.0416667	0	0.0416667
		250	0.333333	0	0.333333			250	0.208333	0.0526316	0.25
nbi_090: Voxtel ZnO + Octanoic Acid (TLAD27)	26	0	0.0416667	0	0.0416667	nbi_137: ZnO I (NI002)	18.3-48.9	0	0.0833333	0	0.0833333
		0.016	0.166667	0	0.166667			0.016	0.0833333	0.0909091	0.166667
		0.08	0.166667	0.05	0.208333			0.08	0	0	0
		0.4	0.125	0	0.125			0.4	0.0416667	0.0434783	0.0833333
		2	0.25	0	0.25			2	0.125	0	0.125
		10	0.125	0	0.125			10	0	0.0416667	0.0416667
		50	0.375	0	0.375			50	0	0.0416667	0.0416667
		250	0.291667	0	0.291667			250	0.0833333	0.0454545	0.125
nbi_091: Aldrich ZnO + para-Nitrobenzoic Acid (TLAD35A)	62	0	0.0416667	0	0.0416667	nbi_138: ZnO I (NI003)	4.0-5.0	0	0	0	0
		0.016	0	0	0			0.016	0.125	0	0.125
		0.08	0	0.0416667	0.0416667			0.08	0.125	0.047619	0.166667
		0.4	0.0416667	0.0434783	0.0833333			0.4	0.125	0.142857	0.25
		2	0.166667	0	0.166667			2	0.125	0	0.125
		10	0.0416667	0	0.0416667			10	0.0416667	0.0434783	0.0833333
		50	0.0416667	0	0.0416667			50	0.0833333	0	0.0833333
		250	0.0416667	0.0869565	0.125			250	0.0833333	0.318182	0.375
nbi_092: Voxtel ZnO + para-Nitrobenzoic Acid (TLAD35)	26	0	0	0	0	nbi_139: ZnO I (NI005)	8.7-11.7	0	0.0833333	0	0.0833333
		0.016	0	0	0			0.016	0.125	0.047619	0.166667
		0.08	0	0	0			0.08	0.0833333	0	0.0833333
		0.4	0	0	0			0.4	0	0.0416667	0.0416667
		2	0	0.0416667	0.0416667			2	0	0	0
		10	0.0416667	0	0.0416667			10	0.125	0	0.125
		50	0	0.0416667	0.0416667			50	0.166667	0	0.166667
		250	0	0.0416667	0.0416667			250	0.25	0	0.25
nbi_093: Aldrich ZnO + Cyclohexane Carboxilic Acid (TLAD31A)	62	0	0	0	0	nbi_187: NanoGard ZnO (NGZ)	40-100	0	0.0416667	0	0.0416667
		0.016	0.0833333	0	0.0833333			0.016	0	0	0
		0.08	0	0	0			0.08	0	0	0
		0.4	0.125	0	0.125			0.4	0	0	0
		2	0.291667	0	0.291667			2	0	0	0
		10	0.25	0.0555556	0.291667			10	0	0.375	0.375
		50	0.25	0	0.25			50	0	1	1
		250	0.291667	0	0.291667			250	0.0833333	1	1
nbi_094: Voxtel ZnO + Cyclohexane Carboxilic Acid (TLAD31)	26	0	0	0	0	nbi_096: Voxtel ZnO + Benzoic Acid (TLAD33)	26	0	0.0833333	0	0.0833333
		0.016	0	0	0			0.016	0.125	0.047619	0.166667
		0.08	0.0416667	0	0.0416667			0.08	0.25	0.0555556	0.291667
		0.4	0.0833333	0	0.0833333			0.4	0.0833333	0	0.0833333
		2	0	0	0			2	0.333333	0	0.333333
		10	0	0	0			10	0.0833333	0	0.0833333
		50	0	0	0			50	0.208333	0	0.208333
		250	0.125	0	0.125			250	0.0833333	0.136364	0.208333
nbi_095: Aldrich ZnO + Benzoic Acid (TLAD33A)	62	0	0.0833333	0	0.0833333
		0.016	0.208333	0.105263	0.291667
		0.08	0.125	0.047619	0.166667
		0.4	0.208333	0	0.208333
		2	0.0416667	0.0434783	0.0833333
		10	0.208333	0.0526316	0.25
		50	0.166667	0	0.166667
		250	0.125	0.047619	0.166667
